# Supplementary material
Source: PubMed Central journal article supplement (PMC9243277)
Supplement: jcsm.9904.sm001.pdf [file jcsm.9904.sm001.pdf]

**Table S1:** Terms used on database search.

| Database                | Search format                                                                                                                                                                                                                                                                                                                                                                                                                                                                                                                                                                                                                                                                                                                                                                                                                                                                                                                                                                                                                                                                                                                                                                                                                                                                                                                                                                                                                                                                                                                                                                                                                                                                                                                                                                                                                                                                                                                                                                                                                                                                                                                                                                                                                                                                                                                                                                                                                                                                                                                                                                                                                                                                                                                                                                                                                                                                                                                                                                         |
|-------------------------|---------------------------------------------------------------------------------------------------------------------------------------------------------------------------------------------------------------------------------------------------------------------------------------------------------------------------------------------------------------------------------------------------------------------------------------------------------------------------------------------------------------------------------------------------------------------------------------------------------------------------------------------------------------------------------------------------------------------------------------------------------------------------------------------------------------------------------------------------------------------------------------------------------------------------------------------------------------------------------------------------------------------------------------------------------------------------------------------------------------------------------------------------------------------------------------------------------------------------------------------------------------------------------------------------------------------------------------------------------------------------------------------------------------------------------------------------------------------------------------------------------------------------------------------------------------------------------------------------------------------------------------------------------------------------------------------------------------------------------------------------------------------------------------------------------------------------------------------------------------------------------------------------------------------------------------------------------------------------------------------------------------------------------------------------------------------------------------------------------------------------------------------------------------------------------------------------------------------------------------------------------------------------------------------------------------------------------------------------------------------------------------------------------------------------------------------------------------------------------------------------------------------------------------------------------------------------------------------------------------------------------------------------------------------------------------------------------------------------------------------------------------------------------------------------------------------------------------------------------------------------------------------------------------------------------------------------------------------------------------|
| <b>PUBMED</b>           | <p>((((((((((((((((((((((((((((((((((((((((((((((((((((((((((("pediatric*" [All Fields] OR "paediatric*" [All Fields]) OR "child*" [All Fields]) OR "newborn*" [All Fields]) OR "congenital*" [All Fields]) OR "infan*" [All Fields]) OR (((("infant, newborn" [MeSH Terms] OR ("infant" [All Fields] AND "newborn" [All Fields])) OR "newborn infant" [All Fields]) OR "baby" [All Fields]) OR "infant" [MeSH Terms]) OR "infant" [All Fields])) OR (((("baby s" [All Fields] OR "babys" [All Fields]) OR "infant" [MeSH Terms]) OR "infant" [All Fields]) OR "babies" [All Fields])) OR ("neonat*" [All Fields] AND (("parturition" [MeSH Terms] OR "parturition" [All Fields]) OR "born" [All Fields]) AND (((("premature birth" [MeSH Terms] OR ("premature" [All Fields] AND "birth" [All Fields])) OR "premature birth" [All Fields]) OR ("pre" [All Fields] AND "term" [All Fields])) OR "pre term" [All Fields])) OR "preterm*" [All Fields]) OR "premature birth*" [All Fields]) AND (((("intensive care units" [MeSH Terms] OR ("intensive" [All Fields] AND "care" [All Fields]) AND "units" [All Fields])) OR "intensive care units" [All Fields]) OR "icu" [All Fields]) AND "preschool*" [All Fields])) OR "pre school*" [All Fields]) OR "kindergarten*" [All Fields]) OR "kindergarden*" [All Fields]) OR "elementary school*" [All Fields]) OR "nursery school*" [All Fields]) OR ("day care*" [All Fields] NOT "adult*" [All Fields])) OR "schoolchild*" [All Fields]) OR "toddler*" [All Fields]) OR (("men" [MeSH Terms] OR "men" [All Fields]) OR "boys" [All Fields])) OR "girl*" [All Fields]) OR "middle school*" [All Fields]) OR "pubescen*" [All Fields]) OR "juvenile*" [All Fields]) OR "teen*" [All Fields]) OR "youth*" [All Fields]) OR "high school*" [All Fields]) OR "adolesc*" [All Fields]) OR "pre pubesc*" [All Fields]) OR "prepubesc*" [All Fields]) OR "child" [MeSH Terms]) OR "infant" [MeSH Terms]) OR "child, exceptional" [MeSH Terms]) OR "adolescent" [MeSH Terms]) OR "pediatrics" [MeSH Terms]) OR "child, abandoned" [MeSH Terms]) OR "child, orphaned" [MeSH Terms]) OR "child, unwanted" [MeSH Terms]) OR "minors" [MeSH Terms]) AND (((((((("sleep apnea syndrom*" [All Fields] OR "sleep apnoea syndrom*" [All Fields]) OR "sleep apnea*" [All Fields]) OR "sleep apnoea*" [All Fields]) OR "obstructive sleep apnea*" [All Fields]) OR "obstructive sleep apnoea*" [All Fields]) OR "Upper Airway Resistance Sleep Apnea Syndrome" [All Fields]) OR "Sleep-Disordered Breathing" [All Fields]) OR "nocturnal upper airway obstruction*" [All Fields]) OR "sleep apnea syndromes" [MeSH Terms])) AND ("face" [MeSH Terms] OR (((("skeletal*" [All Fields] OR "dental*" [All Fields]) OR "craniofacial*" [All Fields] OR "Facial phenotyping*" [All Fields]) OR "face*" [All Fields]) OR (((("face" [MeSH Terms] OR "face" [All Fields]) OR "facial" [All Fields]) OR "facials" [All Fields]) AND "bone*" [All Fields]))))</p> |
| <b>MEDLINE via Ovid</b> | <p>1 adolescent development/ or childhood development/ or pediatrics/ or exp Congenital Disorders/ or child characteristics/ or child abuse/ or exp child welfare/ or chronically ill children/ or child neglect/ or child psychiatry/ or child psychopathology/ or exp child care/ or (pediatric* or paediatric* or child* or newborn* or congenital* or infan* or baby or babies or neonat* or pre term or preterm* or premature birth or NICU or preschool* or pre school* or kindergarten* or elementary school* or nursery school* or schoolchild* or toddler* or boy or boys or girl* or middle school* or pubescen* or juvenile* or teen* or youth* or high school* or adolesc* or prepubesc* or pre pubesc*).mp. or (child* or adolesc* or pediat* or paediat*).jn. (5096895)</p>                                                                                                                                                                                                                                                                                                                                                                                                                                                                                                                                                                                                                                                                                                                                                                                                                                                                                                                                                                                                                                                                                                                                                                                                                                                                                                                                                                                                                                                                                                                                                                                                                                                                                                                                                                                                                                                                                                                                                                                                                                                                                                                                                                                             |

- 
- 2 Sleep Apnea, Obstructive/ (20245)
  - 3 (Sleep Apnea Syndrom\* or Sleep Apnoea Syndrom\* or Sleep Apnea\* or Sleep Apnoea\* or Obstructive Sleep Apnea\* or Obstructive Sleep Apnoea\* or Upper Airway Resistance Sleep Apnea Syndrome or Sleep-Disordered Breathing or Nocturnal upper airway obstruction\*).mp. [mp=title, abstract, original title, name of substance word, subject heading word, floating sub-heading word, keyword heading word, organism supplementary concept word, protocol supplementary concept word, rare disease supplementary concept word, unique identifier, synonyms] (47360)
  - 4 exp Face/ (158522)
  - 5 (Skeletal\* or Dental\* or Craniofacial\* or Face\* or Facial bone\* or Facial phenotyping).mp. [mp=title, abstract, original title, name of substance word, subject heading word, floating sub-heading word, keyword heading word, organism supplementary concept word, protocol supplementary concept word, rare disease supplementary concept word, unique identifier, synonyms] (1096857)
  - 6 2 or 3 (47360)
  - 7 4 or 5 (1201941)
  - 8 1 and 6 and 7 (1224)

---

**EMBASE  
via Ovid**

- 1 juvenile/ or exp adolescent/ or exp child/ or exp postnatal development/ or (pediatric\* or paediatric\* or child\* or newborn\* or congenital\* or infan\* or baby or babies or neonat\* or pre term or preterm\* or premature birth or NICU or preschool\* or pre school\* or kindergarten\* or elementary school\* or nursery school\* or schoolchild\* or toddler\* or boy or boys or girl\* or middle school\* or pubescen\* or juvenile\* or teen\* or youth\* or high school\* or adolesc\* or prepubesc\* or pre pubesc\*).mp. or (child\* or adolesc\* or pediat\* or paediat\*).jn. (4725179)
- 2 exp sleep disordered breathing/ or upper airway resistance syndrome/ (51517)
- 3 (Sleep Apnea Syndrom\* or Sleep Apnoea Syndrom\* or Sleep Apnea\* or Sleep Apnoea\* or Obstructive Sleep Apnea\* or Obstructive Sleep Apnoea\* or Upper Airway Resistance Sleep Apnea Syndrome or Sleep-Disordered Breathing or Nocturnal upper airway obstruction\*).mp. [mp=title, abstract, heading word, drug trade name, original title, device manufacturer, drug manufacturer, device trade name, keyword, floating subheading word, candidate term word] (85685)
- 4 2 or 3 (86458)
- 5 exp face/ (103616)
- 6 (Skeletal\* or Dental\* or Craniofacial\* or Face\* or Facial bone\* or Facial phenotyping).mp. [mp=title, abstract, heading word, drug trade name, original title, device manufacturer, drug manufacturer, device trade name, keyword, floating subheading word, candidate term word] (1117155)
- 7 5 or 6 (1164734)
- 8 1 and 4 and 7 (2052)

---

**WEB OF  
SCIENCE**

#1: TOPIC: (pediatric\* or paediatric\* or child\* or newborn\* or congenital\* or infan\* or baby or babies or neonat\* or "pre term" or preterm\* or "premature birth" or NICU or preschool\* or "pre school\*" or kindergarten\* or "elementary school\*" or "nursery school\*" or schoolchild\* or toddler\* or boy or boys or girl\* or "middle school\*" or pubescen\* or juvenile\* or

---

---

teen\* or youth\* or "high school\*" or adolesc\* or prepubesc\* or pre pubesc\*)  
Indexes=SCI-EXPANDED, SSCI, A&HCI, CPCI-S, CPCI-SSH, BKCI-S, BKCI-SSH, ESCI, CCR-EXPANDED, IC  
Timespan=All years  
#2: TOPIC: ("Sleep Apnea Syndrom\*" or "Sleep Apnoea Syndrom\*" or "Sleep Apnea\*" or "Sleep Apnoea\*" or  
"Obstructive Sleep Apnea\*" or "Obstructive Sleep Apnoea\*" or "Upper Airway Resistance Sleep Apnea Syndrome" or  
"Sleep-Disordered Breathing" or "Nocturnal upper airway obstruction\*")  
Indexes=SCI-EXPANDED, SSCI, A&HCI, CPCI-S, CPCI-SSH, ESCI Timespan=All years  
#3: TOPIC: (Skeletal\* or Dental\* or Craniofacial\* or Face\* or "Facial phenotyping" or "Facial bone\*")  
Indexes=SCI-EXPANDED, SSCI, A&HCI, CPCI-S, CPCI-SSH, ESCI Timespan=All years  
Final search: #3 AND #2 AND #1

---

**SCOPUS** ( ( TITLE-ABS-KEY ( pediatric\* OR paediatric\* OR child\* OR newborn\* OR congenital\* OR infan\* OR baby OR babies OR neonat\* OR "pre term" OR preterm\* OR "premature birth" OR nicu OR preschool\* OR "pre school\*" OR kindergarten\* OR "elementary school\*" OR "nursery school\*" ) OR TITLE-ABS-KEY ( schoolchild\* OR toddler\* OR boy OR boys OR girl\* OR "middle school\*" OR pubescen\* OR juvenile\* OR teen\* OR youth\* OR "high school\*" OR adolesc\* OR prepubesc\* OR pre AND pubesc\* ) ) ) AND ( ( TITLE-ABS-KEY ( "Sleep Apnea Syndrom\*" OR "Sleep Apnoea Syndrom\*" OR "Sleep Apnea\*" OR "Sleep Apnoea\*" OR "Obstructive Sleep Apnea\*" OR "Obstructive Sleep Apnoea\*" OR "Upper Airway Resistance Sleep Apnea Syndrome" OR "Sleep-Disordered Breathing" ) OR TITLE-ABS-KEY ( "Nocturnal upper airway obstruction\*" ) ) ) AND ( TITLE-ABS-KEY ( skeletal\* OR dental\* OR craniofacial\* OR face\* OR "Facial phenotyping" OR "Facial bone\*" ) ) )

---

**LILACS** (tw:((child\$) OR (pediatric\$) OR (paediatric) OR (newborn\$) OR (infan\$) OR (baby) OR (babies) OR (neonat\$) OR (pre term) OR (preterm\$) OR (premature birth) OR (NICU) or (kindergarten\$) OR (nursery school\$) OR (elementary school\$) OR (schoolchild\$) OR (toddler\$) OR (boy) OR (boys) OR (girl\$) OR (preschool\$) OR (pre-school\$) OR (middle school\$) OR (pubescen\$) OR (juvenile\$) OR (teen\$) OR (youth\$) OR (adolesc\$) OR (pre-pubesc\$) OR (prepubesc\$))) AND (tw:((Sleep Apnea Syndrom\$) or (Sleep Apnoea Syndrom\$) or (Sleep Apnea\$) or (Sleep Apnoea\$) or (Obstructive Sleep Apnea\$) or (Obstructive Sleep Apnoea\$) or (Upper Airway Resistance Sleep Apnea Syndrom\$) or (Sleep-Disordered Breathing) or (Nocturnal upper airway obstruction\$))) AND (tw:((Skeletal\$) or (Dental\$) or (Craniofacial\$) or (Face\$) or (Facial phenotyping\$) or (Facial bone\$)))

---

**COCHRANE** #1 pediatric\* or paediatric\* or child\* or newborn\* or congenital\* or infan\* or baby or babies or neonat\* or "pre term" or preterm\* or "premature birth" or NICU or preschool\* or "pre school\*" or kindergarten\* or "elementary school\*" or "nursery school\*" or schoolchild\* or toddler\* or boy or boys or girl\* or "middle school\*" or pubescen\* or juvenile\* or teen\* or youth\* or "high school\*" or adolesc\* or prepubesc\* or pre pubesc\* in Title Abstract Keyword - (Word variations have been searched)  
#2 "Sleep Apnea Syndrom\*" or "Sleep Apnoea Syndrom\*" or "Sleep Apnea\*" or "Sleep Apnoea\*" or "Obstructive

---

---

Sleep Apnea\*" or "Obstructive Sleep Apnoea\*" or "Upper Airway Resistance Sleep Apnea Syndrome" or "Sleep-Disordered Breathing" or "Nocturnal upper airway obstruction\*" in Title Abstract Keyword - (Word variations have been searched)

#3 Skeletal\* or Dental\* or Craniofacial\* or Face\* or "Facial bone\*" or "Facial phenotyping" in Title Abstract Keyword - (Word variations have been searched)

Final search: #1 AND #2 AND #3

---

**OPENGREY**

Sleep apnea AND face

---

**Table S2: Articles excluded after full-text evaluation, with reasons (n=76)**

| Article excluded                                          | Reasons for exclusion |
|-----------------------------------------------------------|-----------------------|
| (Cobo Plana and de Carlos Villafranca 2010)               | 1                     |
| (Müller-Hagedorn et al. 2015)                             | 1                     |
| (Rangel Chávez, Espinosa Martínez, and Medina Serpa 2016) | 1                     |
| (Aktas et al. 2016)                                       | 2                     |
| (Albajalan, Samsudin, and Hassan 2011)                    | 2                     |
| (Brasil et al. 2016)                                      | 2                     |
| (Chang and Shiao 2008)                                    | 2                     |
| (Chi et al. 2011)                                         | 2                     |
| (Endo, Mataka, and Kurosaki 2003)                         | 2                     |
| (Faria et al. 2012)                                       | 2                     |
| (Ito et al. 2001)                                         | 2                     |
| (Lee, Chan, et al. 2009)                                  | 2                     |
| (Lee, Petocz, et al. 2009)                                | 2                     |
| (Sawanyawisuth et al. 2016)                               | 2                     |
| (Frohberg, Naples, and Jones 1995)                        | 2                     |
| (Tangugsorn et al. 1999)                                  | 2                     |
| (Vezina et al. 2012)                                      | 2                     |
| (Llombart et al. 2007)                                    | 3                     |
| (Guillemineault et al. 2016)                              | 4                     |
| (Huang et al. 2019)                                       | 4                     |
| (Shigeto Kawashima et al. 1999)                           | 4                     |
| (Lai et al. 2018)                                         | 4                     |
| (Leach et al. 1992)                                       | 4                     |
| (Ni et al. 2007)                                          | 4                     |
| (Nanaware, Gothi, and Joshi 2006)                         | 4                     |
| (Pirelli et al. 2010)                                     | 4                     |
| (J. Wang et al. 2019)                                     | 4                     |
| (Wu et al. 2019)                                          | 4                     |
| (Xu et al. 2020)                                          | 4                     |
| (Yan et al. 2020)                                         | 4                     |
| (Hotwani, Sharma, and Jaiswal 2018)                       | 4                     |
| (Martinelli et al. 2017)                                  | 5                     |
| (Shen et al. 2018)                                        | 5                     |
| (Arens et al. 2011)                                       | 6                     |
| (Tong et al. 2016)                                        | 6                     |
| (Al Ali et al. 2015)                                      | 7                     |
| (Ardehali et al. 2016)                                    | 7                     |
| (Carvalho et al. 2014)                                    | 7                     |
| (Cuccia, Lotti, and Caradonna 2008)                       | 7                     |
| (Angela Galeotti et al. 2018)                             | 7                     |
| (A Galeotti et al. 2019)                                  | 7                     |
| (Hultcrantz and Löfstrand Tideström 2009)                 | 7                     |
| (Ikävalko et al. 2018)                                    | 7                     |
| (Juliano et al. 2013)                                     | 7                     |

|                                     |    |
|-------------------------------------|----|
| (S Kawashima 2002)                  | 7  |
| (Shigeto Kawashima et al. 2003)     | 7  |
| (Lopatiené et al. 2016)             | 7  |
| (Nikakhlagh et al. 2010)            | 7  |
| (Sato et al. 2012)                  | 7  |
| (Watanabe and Miyamoto 2002)        | 7  |
| (Kushida 1997)                      | 7  |
| (Shigeto Kawashima et al. 2012)     | 7  |
| (Pirilá et al. 1995)                | 7  |
| (Zucconi et al. 1999)               | 8  |
| (Yap et al. 2019)                   | 8  |
| (Lian et al. 2017)                  | 9  |
| (Marino et al. 2009)                | 9  |
| (Vilovic et al. 2019)               | 9  |
| (Matsumoto et al. 2007)             | 9  |
| (Ozdemir et al. 2004)               | 9  |
| (K. Ågren, B. Nordlander 1998)      | 9  |
| (AlHammad, Hakeem, and Salama 2015) | 10 |
| (Bergamo et al. 2014)               | 10 |
| (Cappabianca et al. 2013)           | 10 |
| (Hotwani, Sharma, and Jaiswal 2018) | 10 |
| (Shigeto Kawashima et al. 2012)     | 10 |
| (S Kawashima et al. 2000)           | 10 |
| (Perillo et al. 2013)               | 10 |
| (Pirila-Parkkinen et al. 2009)      | 10 |
| (Pirila-Parkkinen et al. 2010)      | 10 |
| (Vieira et al. 2011)                | 10 |
| (Zettergren-Wijk 2006)              | 10 |
| (W. Wang, Wang, and Wang 2012)      | 10 |
| (Vieira et al. 2014)                | 10 |
| (Löfstrand-Tideström et al. 1999)   | 11 |
| (Deng, Gao, and Zeng 2010)          | 12 |

‡ Reasons for exclusion: 1- Review articles ; 2- Adult sample ; 3- Participants with craniofacial syndrome ; 4- Absence of craniofacial analysis ; 5- No information about the type of craniofacial problems ; 6- The study included only obese participants ; 7- No report of standard nPSG among OSA children; 8- Inclusion of non-OSA children in the sample ; 9- Absence of control group; 10- Absence of nPSG control group; 11- Non-standard classification of OSA; 12- Over sample.

## REFERENCES

- Aktas, Fatma et al. 2016. "Evaluation of Morphological Changes in Pharynx with Dynamic CT and MRI in Snoring Patients." *Revista médica de Chile* 144(9): 1125–33.  
[http://www.scielo.cl/scielo.php?script=sci\\_arttext&pid=S0034-98872016000900005&lng=en&nrm=iso&tlng=en](http://www.scielo.cl/scielo.php?script=sci_arttext&pid=S0034-98872016000900005&lng=en&nrm=iso&tlng=en).
- Albajalan, O. B., A. R. Samsudin, and R. Hassan. 2011. "Craniofacial Morphology of Malay Patients with Obstructive Sleep Apnoea." *The European Journal of Orthodontics* 33(5): 509–14.  
<https://academic.oup.com/ejo/article-lookup/doi/10.1093/ejo/ejq108>.
- AlHammad, Nouf Saleh, Lujain A. Hakeem, and Fouad S Salama. 2015. "Orofacial Findings Associated with Obstructive Sleep Apnea in a Group of Saudi Children." *Pakistan Journal of Medical Sciences* 31(2): 35–39.  
<https://login.ezproxy.library.ualberta.ca/login?url=http://ovidsp.ovid.com/ovidweb.cgi?T=JS&CSC=Y&NEW>

S=N&PAGE=fulltext&D=emed16&AN=615105603.

- Al Ali, Ala et al. 2015. "The Influence of Snoring, Mouth Breathing and Apnoea on Facial Morphology in Late Childhood: A Three-Dimensional Study." *BMJ Open* 5(9): e009027.  
<http://bmjopen.bmj.com/content/5/9/e009027.full.pdf+html>;
- Ardehali, Mojtaba Mohamadi, Varasteh Vakili Zarch, Mohammad-esmaeil Joibari, and Ali Kouhi. 2016. "Cephalometric Assessment of Upper Airway Effects on Craniofacial Morphology." *Journal of Craniofacial Surgery* 27(2): 361–64.  
<https://login.ezproxy.library.ualberta.ca/login?url=http://ovidsp.ovid.com/ovidweb.cgi?T=JS&CSC=Y&NEW S=N&PAGE=fulltext&D=emed17&AN=616251737>.
- Arens, Raanan et al. 2011. "Upper Airway Structure and Body Fat Composition in Obese Children with Obstructive Sleep Apnea Syndrome." *American Journal of Respiratory and Critical Care Medicine* 183(6): 782–87.  
<http://www.atsjournals.org/doi/abs/10.1164/rccm.201008-1249OC>.
- Bergamo, Ana Z.N. et al. 2014. "Adenoid Hypertrophy, Craniofacial Morphology in Apneic Children." *Pediatric Dental Journal* 24(2): 71–77. <https://linkinghub.elsevier.com/retrieve/pii/S0917239414000147>.
- Brasil, Danieli Moura, Lúcio Mitsuo Kurita, Francisco Carlos Groppo, and Francisco Haiter-Neto. 2016. "Relationship of Craniofacial Morphology in 3-Dimensional Analysis of the Pharynx." *American Journal of Orthodontics and Dentofacial Orthopedics* 149(5): 683–691.e1.  
<https://linkinghub.elsevier.com/retrieve/pii/S0889540616000342>.
- Cappabianca, Salvatore et al. 2013. "Magnetic Resonance Imaging in the Evaluation of Anatomical Risk Factors for Pediatric Obstructive Sleep Apnoea–Hypopnoea: A Pilot Study." *International Journal of Pediatric Otorhinolaryngology* 77(1): 69–75.  
<https://login.ezproxy.library.ualberta.ca/login?url=http://ovidsp.ovid.com/ovidweb.cgi?T=JS&CSC=Y&NEW S=N&PAGE=fulltext&D=emed14&AN=52254423>.
- Carvalho, Fernando Rodrigues et al. 2014. "Sleep-Disordered Breathing and Orthodontic Variables in Children—Pilot Study." *International Journal of Pediatric Otorhinolaryngology* 78(11): 1965–69.  
<http://www.elsevier.com/locate/ijporl>;
- Chang, En-Ting, and Guang-Ming Shiao. 2008. "Craniofacial Abnormalities in Chinese Patients with Obstructive and Positional Sleep Apnea." *Sleep Medicine* 9(4): 403–10.  
<https://linkinghub.elsevier.com/retrieve/pii/S138994570700192X>.
- Chi, L. et al. 2011. "Identification of Craniofacial Risk Factors for Obstructive Sleep Apnoea Using Three-Dimensional MRI." *European Respiratory Journal* 38(2): 348–58.  
<http://erj.ersjournals.com/cgi/doi/10.1183/09031936.00119210>.
- Cobo Plana, Juan, and Félix de Carlos Villafranca. 2010. "Ortopedia Maxilar y Trastornos Respiratorios Del Sueño En Niños." *Acta Otorrinolaringológica Española* 61(SUPPL. 1): 69–73.  
<https://login.ezproxy.library.ualberta.ca/login?url=http://ovidsp.ovid.com/ovidweb.cgi?T=JS&CSC=Y&NEW S=N&PAGE=fulltext&D=emed11&AN=361328417>.
- Cuccia, Antonino Marco, Maurizio Lotti, and Domenico Caradonna. 2008. "Oral Breathing and Head Posture." *The Angle Orthodontist* 78(1): 77–82. <https://meridian.allenpress.com/angle-orthodontist/article/78/1/77/58675/Oral-Breathing-and-Head-Posture>.
- Deng, Jin-rong, Xue-mei Gao, and Xiang-long Zeng. 2010. "[Relationship between Craniofacial and Airway Structure and Pediatric Obstructive Sleep Apnea and Hyponea Syndromes: A Case-Control Study]." *Beijing da xue xue bao. Yi xue ban = Journal of Peking University. Health sciences* 42(6): 697–702.  
<https://login.ezproxy.library.ualberta.ca/login?url=http://ovidsp.ovid.com/ovidweb.cgi?T=JS&CSC=Y&NEW S=N&PAGE=fulltext&D=emed11&AN=360302164>.
- Endo, Satoshi, Shiro Mataka, and Norimasa Kurosaki. 2003. "Cephalometric Evaluation of Craniofacial and Upper Airway Structures in Japanese Patients with Obstructive Sleep Apnea." *Journal of medical and dental sciences* 50(1): 109–20. <http://www.ncbi.nlm.nih.gov/pubmed/12715927>.
- Faria, Ana Célia et al. 2012. "Comparison of the Area of the Pharynx during Wakefulness and Induced Sleep in Patients with Obstructive Sleep Apnea (OSA)." *Brazilian Journal of Otorhinolaryngology* 78(1): 103–8.  
<https://linkinghub.elsevier.com/retrieve/pii/S1808869415303724>.
- Frohberg, Uwe, Robert J. Naples, and Daniel L. Jones. 1995. "Cephalometric Comparison of Characteristics in Chronically Snoring Patients with and without Sleep Apnea Syndrome." *Oral Surgery, Oral Medicine, Oral Pathology, Oral Radiology, and Endodontology* 80(1): 28–33.  
<https://linkinghub.elsevier.com/retrieve/pii/S1079210495800123>.
- Galeotti, A et al. 2019. "Correlation between Cephalometric Variables and Obstructive Sleep Apnoea Severity in Children." *European journal of paediatric dentistry* 20(1): 43–47.

- <http://www.ncbi.nlm.nih.gov/pubmed/30919644>.
- Galeotti, Angela et al. 2018. "Prevalence of Malocclusion in Children with Obstructive Sleep Apnoea." *Orthodontics & Craniofacial Research* 21(4): 242–47.  
<https://login.ezproxy.library.ualberta.ca/login?url=http://ovidsp.ovid.com/ovidweb.cgi?T=JS&CSC=Y&NEW S=N&PAGE=fulltext&D=emed19&AN=624518217>.
- Guilleminault, Christian et al. 2016. "Missing Teeth and Pediatric Obstructive Sleep Apnea." *Sleep and Breathing* 20(2): 561–68. <http://www.springeronline.com/sgw/cda/frontpage/0,11855,1-40109-70-39223762-0,00.html>;
- Hotwani, Kavita, Krishna Sharma, and Arpan Jaiswal. 2018. "Evaluation of Tongue/Mandible Volume Ratio in Children with Obstructive Sleep Apnea." *Dental Press Journal of Orthodontics* 23(4): 72–78.  
[http://www.scielo.br/scielo.php?script=sci\\_arttext&pid=S2176-94512018000400072&lng=en&tlng=en](http://www.scielo.br/scielo.php?script=sci_arttext&pid=S2176-94512018000400072&lng=en&tlng=en).
- Huang, Yu-Shu et al. 2019. "Sleep-Disordered Breathing, Craniofacial Development, and Neurodevelopment in Premature Infants: A 2-Year Follow-up Study." *Sleep Medicine* 60: 20–25.  
<http://www.elsevier.com/inca/publications/store/6/2/0/2/8/2>;
- Hultcrantz, E., and B. Löfstrand Tideström. 2009. "The Development of Sleep Disordered Breathing from 4 to 12 Years and Dental Arch Morphology." *International Journal of Pediatric Otorhinolaryngology* 73(9): 1234–41.  
<https://login.ezproxy.library.ualberta.ca/login?url=http://ovidsp.ovid.com/ovidweb.cgi?T=JS&CSC=Y&NEW S=N&PAGE=fulltext&D=emed11&AN=50545170>.
- Ikävalko, Tiina et al. 2018. "Predictors of Sleep Disordered Breathing in Children: The PANIC Study." *European Journal of Orthodontics* 40(3): 268–72. <https://academic.oup.com/ejo/article/40/3/268/3947801>.
- Ito, Daisuke et al. 2001. "Craniofacial Abnormalities in Japanese Patients with Severe Obstructive Sleep Apnoea Syndrome." *Respirology* 6(2): 157–61. <http://doi.wiley.com/10.1046/j.1440-1843.2001.00325.x>.
- Juliano, Maria Ligia et al. 2013. "Obstructive Sleep Apnea Prevents the Expected Difference in Craniofacial Growth of Boys and Girls." *Arquivos de Neuro-Psiquiatria* 71(1): 18–24.  
[http://www.scielo.br/scielo.php?script=sci\\_arttext&pid=S0004-282X2013000100005&lng=en&tlng=en](http://www.scielo.br/scielo.php?script=sci_arttext&pid=S0004-282X2013000100005&lng=en&tlng=en).
- K. Ågren, B. Nordlander, S. Linder-. 1998. "Children with Nocturnal Upper Airway Obstruction: Postoperative Orthodontic and Respiratory Improvement." *Acta Oto-Laryngologica* 118(4): 581–87.  
<https://login.ezproxy.library.ualberta.ca/login?url=http://ovidsp.ovid.com/ovidweb.cgi?T=JS&CSC=Y&NEW S=N&PAGE=fulltext&D=emed6&AN=28351342>.
- Kawashima, S et al. 2000. "Cephalometric Comparisons of Craniofacial and Upper Airway Structures in Young Children with Obstructive Sleep Apnea Syndrome." *Ear, nose, & throat journal* 79(7): 499–502, 505–6.  
<http://www.ncbi.nlm.nih.gov/pubmed/10935301>.
- . 2002. "Sex-Dependent Differences in the Craniofacial Morphology of Children with a Sleep-Related Breathing Disorder." *Oral surgery, oral medicine, oral pathology, oral radiology, and endodontics* 94(2): 167–74.  
<https://login.ezproxy.library.ualberta.ca/login?url=http://ovidsp.ovid.com/ovidweb.cgi?T=JS&CSC=Y&NEW S=N&PAGE=fulltext&D=emed7&AN=35519978>.
- Kawashima, Shigeto et al. 1999. "Clinical Findings in Japanese Children with Obstructive Sleep Apnea Syndrome. Focus on Dental Findings." *Journal of Oral Science* 41(3): 99–103.  
<https://login.ezproxy.library.ualberta.ca/login?url=http://ovidsp.ovid.com/ovidweb.cgi?T=JS&CSC=Y&NEW S=N&PAGE=fulltext&D=emed6&AN=31292556>.
- . 2003. "Absence of Facial Type Differences among Preschool Children with Sleep-Related Breathing Disorder." *Acta Odontologica Scandinavica* 61(2): 65–71.  
<http://www.tandfonline.com/doi/full/10.1080/00016350310001406>.
- . 2012. "Relationship between Growth of Facial Morphology and Chronologic Age in Preschool Children with Obstructive Sleep Apnea." *Journal of Oral Biology and Craniofacial Research* 2(1): 20–24.  
<https://linkinghub.elsevier.com/retrieve/pii/S2212426812600062>.
- Kushida, Cleto A. 1997. "A Predictive Morphometric Model for the Obstructive Sleep Apnea Syndrome." *Annals of Internal Medicine* 127(8\_Part\_1): 581. [http://annals.org/article.aspx?doi=10.7326/0003-4819-127-8\\_Part\\_1-199710150-00001](http://annals.org/article.aspx?doi=10.7326/0003-4819-127-8_Part_1-199710150-00001).
- Lai, Chi-Chih et al. 2018. "Clinical Predictors of Pediatric Obstructive Sleep Apnea Syndrome." *Annals of Otolaryngology & Rhinology* 127(9): 608–13. <http://journals.sagepub.com/doi/10.1177/0003489418781961>.
- Leach, J., J. Olson, J. Hermann, and S. Manning. 1992. "Polysomnographic and Clinical Findings in Children With Obstructive Sleep Apnea." *Archives of Otolaryngology - Head and Neck Surgery* 118(7): 741–44.  
<http://archotol.jamanetwork.com/article.aspx?articleid=620811>.
- Lee, Richard W W, Peter Petocz, et al. 2009. "Prediction of Obstructive Sleep Apnea with Craniofacial



- Photographic Analysis.” *Sleep* 32(1): 46–52. <http://www.ncbi.nlm.nih.gov/pubmed/19189778>.
- Lee, Richard W W, Andrew S L Chan, Ronald R Grunstein, and Peter A Cistulli. 2009. “Craniofacial Phenotyping in Obstructive Sleep Apnea--a Novel Quantitative Photographic Approach.” *Sleep* 32(1): 37–45. <http://www.ncbi.nlm.nih.gov/pubmed/19189777>.
- Lian, Yun-Chia et al. 2017. “The Preliminary Results of the Differences in Craniofacial and Airway Morphology between Preterm and Full-Term Children with Obstructive Sleep Apnea.” *Journal of Dental Sciences* 12(3): 253–60. <https://linkinghub.elsevier.com/retrieve/pii/S1991790217300545>.
- Llombart, Mónica et al. 2007. “Sleep Apnea-Hypopnea Syndrome in a Pediatric Population: Differences Between Children With Tonsillar Hypertrophy and Those With Concomitant Disease.” *Archivos de Bronconeumología ((English Edition))* 43(12): 655–61. <http://external.doyma.es/pdf/6/6v43n12a13112963pdf001.pdf>;
- Löfstrand-Tideström, B et al. 1999. “Breathing Obstruction in Relation to Craniofacial and Dental Arch Morphology in 4-Year-Old Children.” *European journal of orthodontics* 21(4): 323–32. <https://login.ezproxy.library.ualberta.ca/login?url=http://ovidsp.ovid.com/ovidweb.cgi?T=JS&CSC=Y&NEW S=N&PAGE=fulltext&D=emed6&AN=129468584>.
- Lopatiene, Kristina et al. 2016. “Relationship between Malocclusion, Soft Tissue Profile, and Pharyngeal Airways: A Cephalometric Study.” *Medicina (Kaunas, Lithuania)* 52(5): 307–14. <http://www.ncbi.nlm.nih.gov/pubmed/27816426>.
- Marino, A et al. 2009. “Craniofacial Morphology in Preschool Children with Obstructive Sleep Apnoea Syndrome.” *European journal of paediatric dentistry* 10(4): 181–84. <https://login.ezproxy.library.ualberta.ca/login?url=http://ovidsp.ovid.com/ovidweb.cgi?T=JS&CSC=Y&NEW S=N&PAGE=fulltext&D=emed11&AN=358360280>.
- Martinelli, Eli O et al. 2017. “Clinicals And Upper Airway Characteristics in Obese Children with Obstructive Sleep Apnea.” *Sleep Science* 10(1): 1–6. <http://sleepscience.org.br/>;
- Matsumoto, E. et al. 2007. “Sleep Architecture and the Apnoea/Hypopnoea Index in Children with Obstructive-Sleep Apnoea Syndrome.” *Journal of Oral Rehabilitation* 34(2): 112–20. <https://login.ezproxy.library.ualberta.ca/login?url=http://ovidsp.ovid.com/ovidweb.cgi?T=JS&CSC=Y&NEW S=N&PAGE=fulltext&D=emed10&AN=46146602>.
- Müller-Hagedorn, S., M. Bacher, C.F. Poets, and M.S. Urschitz. 2015. “Zephalometrische Risikofaktoren Der Obstruktiven Schlafapnoe Beim Kind.” *Monatsschrift Kinderheilkunde* 163(8): 812–19. <http://link.springer.com/10.1007/s00112-015-3348-1>.
- Nanaware, Sameer Kumar V., D. Gothi, and J M Joshi. 2006. “Sleep Apnea.” *The Indian Journal of Pediatrics* 73(7): 597–601. <http://www.ijppediatricsindia.org/article.asp?issn=0019-5456;year=2006;volume=73;issue=7;spage=597;epage=601;aualst=Nanaware;>
- Ni, Li-Yan et al. 2007. “[Magnetic Resonance Imaging of the Upper Airway Structure of Children with Sleep Disordered Breathing].” *Zhonghua er bi yan hou tou jing wai ke za zhi = Chinese journal of otorhinolaryngology head and neck surgery* 42(2): 104–8. <http://www.ncbi.nlm.nih.gov/pubmed/17633251>.
- Nikakhlagh, Soheila et al. 2010. “Craniofacial Variables in Subjects with and without Habitual Snoring: A Cephalometric Comparison.” *Indian Journal of Otolaryngology and Head & Neck Surgery* 62(3): 304–9. <http://link.springer.com/10.1007/s12070-010-0089-2>.
- Ozdemir, Hüseyin et al. 2004. “Craniofacial Differences According to AHI Scores of Children with Obstructive Sleep Apnoea Syndrome: Cephalometric Study in 39 Patients.” *Pediatric radiology* 34(5): 393–99. <https://login.ezproxy.library.ualberta.ca/login?url=http://ovidsp.ovid.com/ovidweb.cgi?T=JS&CSC=Y&NEW S=N&PAGE=fulltext&D=emed8&AN=38701989>.
- Perillo, L et al. 2013. “Skeletal and Dental Effects Produced by Functional Regulator-2 in Pre-Pubertal Class II Patients: A Controlled Study.” *Prog Orthod* 14: 18.
- Pirelli, Paola, Maurizio Saponara, Chiara De Rosa, and Ezio Fanucci. 2010. “Orthodontics and Obstructive Sleep Apnea in Children.” *Medical Clinics of North America* 94(3): 517–29. <https://linkinghub.elsevier.com/retrieve/pii/S0025712510000180>.
- Pirila-Parkkinen, K. et al. 2009. “Dental Arch Morphology in Children with Sleep-Disordered Breathing.” *The European Journal of Orthodontics* 31(2): 160–67. <https://academic.oup.com/ejo/article-lookup/doi/10.1093/ejo/cjn061>.
- . 2010. “Cephalometric Evaluation of Children with Nocturnal Sleep-Disordered Breathing.” *The European Journal of Orthodontics* 32(6): 662–71. <https://academic.oup.com/ejo/article-lookup/doi/10.1093/ejo/cjp162>.
- Pirilá, Kirsi et al. 1995. “Sleeping Positions and Dental Arch Dimensions in Children with Suspected Obstructive Sleep Apnea Syndrome.” *European Journal of Oral Sciences* 103(5): 285–91. <https://login.ezproxy.library.ualberta.ca/login?url=http://ovidsp.ovid.com/ovidweb.cgi?T=JS&CSC=Y&NEW S=N&PAGE=fulltext&D=emed6&AN=129468584>.

S=N&PAGE=fulltext&D=emed5&AN=126195142.

- Rangel Chávez, José de Jesús, Cynthia Espinosa Martínez, and Aldo Uzziel Medina Serpa. 2016. "Alteraciones Del Tercio Medio Facial En La Infancia Como Patogénesis Del Síndrome de Apnea Obstruktiva Del Sueño." *Boletín Médico del Hospital Infantil de México* 73(4): 278–82. <http://new.medigraphic.com/cgi-bin/publicaciones.cgi?IDREVISTA=100&NOMBRE=Bolet%EDn M%E9dico del Hospital Infantil de M%E9xico>;
- Sato, K, T Shirakawa, H Sakata, and S Asanuma. 2012. "Effectiveness of the Analysis of Craniofacial Morphology and Pharyngeal Airway Morphology in the Treatment of Children with Obstructive Sleep Apnoea Syndrome." *Dentomaxillofacial Radiology* 41(5): 411–16. <http://dmfr.birjournals.org/content/41/5/411.full.pdf+html>;
- Sawanyawisuth, Kittisak et al. 2016. "Which Oropharyngeal Factors Are Significant Risk Factors for Obstructive Sleep Apnea? An Age-Matched Study and Dentist Perspectives." *Nature and Science of Sleep* Volume 8: 215–19. <https://www.dovepress.com/which-oropharyngeal-factors-are-significant-risk-factors-for-obstructi-peer-reviewed-article-NSS>.
- Shen, Ling, Zongtong Lin, Xing Lin, and Zhongjie Yang. 2018. "Risk Factors Associated with Obstructive Sleep Apnea-Hypopnea Syndrome in Chinese Children: A Single Center Retrospective Case-Control Study" ed. Manlio Milanese. *PLOS ONE* 13(9): e0203695. <https://journals.plos.org/plosone/article/file?id=10.1371/journal.pone.0203695&type=printable>;
- Tangugsorn, V, O Krogstad, L Espeland, and T Lyberg. 1999. "Obstructive Sleep Apnea: A Principal Component Analysis." *The International journal of adult orthodontics and orthognathic surgery* 14(3): 215–28. <http://www.ncbi.nlm.nih.gov/pubmed/10686846>.
- Tong, Yubing et al. 2016. "MR Image Analytics to Characterize the Upper Airway Structure in Obese Children with Obstructive Sleep Apnea Syndrome" ed. Josué Sznitman. *PLOS ONE* 11(8): e0159327. <https://dx.plos.org/10.1371/journal.pone.0159327>.
- Vezina, J P, M Blumen, I Buchet, and F Chabolle. 2012. "Sleep-Disordered Breathing: Choosing the Right Cephalometric Analysis." *Journal of Oral and Maxillofacial Surgery* 70(6): 1442–48. <https://www.scopus.com/inward/record.uri?eid=2-s2.0-84861227407&doi=10.1016%2Fj.joms.2011.03.042&partnerID=40&md5=758c68b3d91e507d1dadf0d6442e7dcb>.
- Vieira, Bruno B. et al. 2014. "Facial Features and Hyoid Bone Position in Preschool Children with Obstructive Sleep Apnea Syndrome." *European Archives of Oto-Rhino-Laryngology* 271(5): 1305–9. <http://link.springer.de/link/service/journals/00405/index.htm>;
- Vieira, Bruno B et al. 2011. "Cephalometric Evaluation of Facial Pattern and Hyoid Bone Position in Children with Obstructive Sleep Apnea Syndrome." *International journal of pediatric otorhinolaryngology* 75(3): 383–86. <http://www.ncbi.nlm.nih.gov/pubmed/21216478>.
- Vilovic, Marino et al. 2019. "Bone Metabolism Parameters and Inactive Matrix Gla Protein in Patients with Obstructive Sleep Apnea†." *Sleep*. <https://academic.oup.com/sleep/advance-article/doi/10.1093/sleep/zsz243/5601327>.
- Wang, Jing et al. 2019. "Correlations between Obstructive Sleep Apnea and Adenotonsillar Hypertrophy in Children of Different Weight Status." *Scientific Reports* 9(1): 11455. <http://www.nature.com/articles/s41598-019-47596-5>.
- Wang, W., Y. Wang, and X Wang. 2012. "[Cephalometry Study of Craniofacial Growth in Mixed Dentition with OSAHS Children]." *Lin chuang er bi yan hou tou jing wai ke za zhi = Journal of clinical otorhinolaryngology, head, and neck surgery* 26(24): 1127–29. <https://login.ezproxy.library.ualberta.ca/login?url=http://ovidsp.ovid.com/ovidweb.cgi?T=JS&CSC=Y&NEW S=N&PAGE=fulltext&D=emed13&AN=369558212>.
- Watanabe, Y, and K Miyamoto. 2002. "A Nickel Titanium Canine Retraction Spring." *J Clin Orthod* 36(7): 384–88.
- Wu, Yunxiao et al. 2019. "Identification of Different Clinical Faces of Obstructive Sleep Apnea in Children." *International Journal of Pediatric Otorhinolaryngology* 127: 109621. <https://linkinghub.elsevier.com/retrieve/pii/S0165587619303659>.
- Xu, Zhifei et al. 2020. "Risk Factors of Obstructive Sleep Apnea Syndrome in Children." *Journal of Otolaryngology - Head & Neck Surgery* 49(1): 11. <https://journalototons.biomedcentral.com/articles/10.1186/s40463-020-0404-1>.
- Yan, Xiao-hong et al. 2020. "Associations among Sleep Symptoms, Physical Examination, and Polysomnographic Findings in Children with Obstructive Sleep Apnea." *European Archives of Oto-Rhino-Laryngology* 277(2): 623–30. <http://link.springer.com/10.1007/s00405-019-05719-8>.
- Yap, Benlee et al. 2019. "Differences in Dentofacial Morphology in Children with Sleep Disordered Breathing Are

Detected with Routine Orthodontic Records.” *Sleep Medicine* 55: 109–14.

<http://www.elsevier.com/inca/publications/store/6/2/0/2/8/2>;

Zettergren-Wijk, L. 2006. “Changes in Dentofacial Morphology after Adeno-/Tonsillectomy in Young Children with Obstructive Sleep Apnoea--a 5-Year Follow-up Study.” *The European Journal of Orthodontics* 28(4): 319–26. <https://academic.oup.com/ejo/article-lookup/doi/10.1093/ejo/cji119>.

Zucconi, M. et al. 1999. “Craniofacial Modifications in Children with Habitual Snoring and Obstructive Sleep Apnoea: A Case&#150;Control Study.” *European Respiratory Journal* 13(2): 411–17. <https://login.ezproxy.library.ualberta.ca/login?url=http://ovidsp.ovid.com/ovidweb.cgi?T=JS&CSC=Y&NEWS=N&PAGE=fulltext&D=emed6&AN=29086842>.



**Table S5:** Characteristics of the controlled studies without a negative nPSG control group.

| Author/Year/ Study design | Source of sample                                                                                                                                                                                      | n                                                     | Age          | Control group features | OSA index      | Ethnicity | BMI | Assessment of adenotonsillar size                                                                                                                                 | Craniofacial evaluation                                      | Statistical analysis | Main results                                                                                                                                                                                                                                                                                      |
|---------------------------|-------------------------------------------------------------------------------------------------------------------------------------------------------------------------------------------------------|-------------------------------------------------------|--------------|------------------------|----------------|-----------|-----|-------------------------------------------------------------------------------------------------------------------------------------------------------------------|--------------------------------------------------------------|----------------------|---------------------------------------------------------------------------------------------------------------------------------------------------------------------------------------------------------------------------------------------------------------------------------------------------|
| AlHammad 2015/CC          | OSA: Ear-Throat and Nose (ENT) Clinic of King Abdul-Aziz University Hospital (KAUH) and Al Habeeb Private Medical Center, in Riyadh, Saudi Arabia. Control group: College of Dentistry, Saudi Arabia. | Total: 60<br>OSA: 30<br>Control:30                    | 4.3<br>±1.57 | Healthy subjects       | NI             | NI        | NI  | NI                                                                                                                                                                | Facial and occlusal features evaluated by clinical analysis. | independent t-test   | There was no difference between OSA and control groups in facial morphology or facial profile.                                                                                                                                                                                                    |
| Bergamo 2014/ CS          | OSA: Mouth Breathing Center of the School of Medicine of Ribeirao Preto, Brazil<br>Control: Periodontic Clinic, School of Dentistry of Ribeirao Preto, University of Sao Paulo, Brazil.               | Total: 43<br>OSA: 21<br>Control (nasal breathers): 22 | 5.0-10.0     | Nasal breathers        | AHI= 7.5 ± 7.6 | NI        | NI  | All children had obstructive adenoids and in the OSA group. In the control group, adenoids obstructed <50% of their choana. The palatine tonsils were grade I-II. | Cephalometric analysis (14 skeletal craniofacial variables)  | independent t-test   | The length of the mandibular ramus (ArGo) was smaller in the control group when compared to the OSA group (43.23 for OSA vs. 40.47 for controls, p ¼ 0.030). The lower anterior facial height (AFAi) was increased in the OSA group (64.39 cm) when compared to the controls (61.61cm, p< 0.041). |

| Author/Year/ Study design | Source of sample                                                      | n                                         | Age                      | Control group features                                                                                                                                               | OSA index      | Ethnicity | BMI            | Assessment of adenotonsillar size                                                                                                                                                                                                                             | Craniofacial evaluation                                                                                                              | Statistical analysis                              | Main results                                                                                                                                                                                                                                                                                                                                                                                                                                                              |
|---------------------------|-----------------------------------------------------------------------|-------------------------------------------|--------------------------|----------------------------------------------------------------------------------------------------------------------------------------------------------------------|----------------|-----------|----------------|---------------------------------------------------------------------------------------------------------------------------------------------------------------------------------------------------------------------------------------------------------------|--------------------------------------------------------------------------------------------------------------------------------------|---------------------------------------------------|---------------------------------------------------------------------------------------------------------------------------------------------------------------------------------------------------------------------------------------------------------------------------------------------------------------------------------------------------------------------------------------------------------------------------------------------------------------------------|
| Cappabianca 2013/ R-CS    | Department of Diagnostic Imaging, Second University of Naples, Italy. | Total: 80<br>OSA: 40<br>Control group: 40 | OSA: 8.9<br>Control: 9.4 | Not affected by OSA or any other type of sleep-related breathing disorder were selected from a sample of children with MRI for clinical problems not related to OSA. | OAHI= 8.1± 3.5 | Caucasian | NI             | The mean adenoid volume in children with OSA was 9.1 1.8 cm <sup>3</sup> in comparison with 6.3 2.1 cm <sup>3</sup> in controls (p < 0.01) and mean tonsillar volume in children with OSAHS was 9.2 1.5 versus 6.5 1.7 cm <sup>3</sup> in controls (p < 0.01) | MRI evaluation (soft tissues and craniofacial skeleton)                                                                              | independent t-test                                | The mandibular volume of the OSA group was lower when compared to controls (22.2±2.2 cm <sup>3</sup> versus 25.4±2.4 cm <sup>3</sup> , p < 0.05). The vertical position of the hyoid bone in the view of the indices hy-n, hy-B and particularly hy-s (9.8 cm±1.3 in the OSA group versus 8.9±1.2 in the control group, p value < 0.01) was lower in the OSA group compared with controls.                                                                                |
| Eimar 2018/ R-CS          | University of Alberta- Orthodontics Clinics, Canada                   | Total: 96<br>OSA: 72<br>Control: 24       | 11.4±2.9                 | Healthy subjects without SDB symptoms                                                                                                                                | AHI= 2.9 ± 0.6 | NI        | NI             | NI                                                                                                                                                                                                                                                            | Mandibular cortical width (MCW) from panoramic radiographs and cephalometric analysis (FMA, SNA and SNB), nasopharynx airway volume. | independent t-test, Multiple regression analysis. | MCW values were significantly lower in OSA children (MCW = 2.9 ± 0.6 mm) compared to control children (MCW = 3.5 ± 0.6 mm; P = 0.002). Children with OSA had a more vertical direction of mandibular growth (28.4 ± 8.2 degrees) than controls (24.1 ± 5.4, p = 0.004). OSA children had a significantly smaller nasopharynx airway volume (3,325 ± 1,233 mm <sup>3</sup> ) in comparison to controls (4,658 ± 1,676 mm <sup>3</sup> ; P = 0.004).                        |
| Kawashima 2002/ R-CS      | Saitama Prefecture Children's Medical Center in Japan, Japan          | Total: 69<br>OSA: 38<br>Control: 32       | 4.7                      | Healthy subjects without SDB symptoms                                                                                                                                | NI             | NI        | only non-obese | Hypertrophic and non-hypertrophic children were included.                                                                                                                                                                                                     | Cephalometric analysis (34 variables: skeletal craniofacial features and hyoid bone position)                                        | Mann-Whitney U-test                               | There were no differences in the cranial base angulation or hyoid bone position between groups. Compared with the control group children with OSA had a retrognathic mandible (facial axis and location of pogonion), a large posterior facial height, a large interincisal angle with retroclined lower incisors (L1 to ML), a narrow pharyngeal airway space (d-ad1, d-ptv and upper pharynx), an anterior tongue base position (lower pharynx) and a long soft palate. |

| Author/Year/ Study design | Source of sample                                                                                                                                                                                                               | n                                         | Age                                     | Control group features                | OSA index       | Ethnicity                      | BMI                                               | Assessment of adenotonsillar size                                                                                                                                                                                                          | Craniofacial evaluation                                                                                                                | Statistical analysis            | Main results                                                                                                                                                                                                              |
|---------------------------|--------------------------------------------------------------------------------------------------------------------------------------------------------------------------------------------------------------------------------|-------------------------------------------|-----------------------------------------|---------------------------------------|-----------------|--------------------------------|---------------------------------------------------|--------------------------------------------------------------------------------------------------------------------------------------------------------------------------------------------------------------------------------------------|----------------------------------------------------------------------------------------------------------------------------------------|---------------------------------|---------------------------------------------------------------------------------------------------------------------------------------------------------------------------------------------------------------------------|
| Schiffman 2004/ R-CS      | Children's Hospital of Philadelphia, USA.                                                                                                                                                                                      | Total: 36<br>OSA: 24<br>Control: 12       | OSA: 4.9 ± 1.7;<br>controls: 4.9 ± 1.8. | Healthy subjects without SDB symptoms | AHI= 9.8 ± 11.1 | African American and Caucasian | NI                                                | NI                                                                                                                                                                                                                                         | Three-dimensional segmentation of the mandible, using MRI                                                                              | MANOVA, PCA and factor analysis | Individual measurement comparisons revealed no significant differences between groups                                                                                                                                     |
| Perillo 2013/ P-CS        | Sleep Centre of the Infantile Neuropsychiatry Department/Department of Diagnostic Imaging, Seconda Università di Napoli, Italy.                                                                                                | Total: 80<br>OSA: 40<br>Control group: 40 | 8.9                                     | Healthy subjects                      | NI              | NI                             | NI                                                | NI                                                                                                                                                                                                                                         | 27 angular and linear variables related to both craniofacial skeletal and dental morphology were measured by cephalometric evaluation. | independent t-test              | Anterior facial height, height of the lower half of the anterior face, mandible inclination, were greater in the OSA group than in controls. The hyoid bone was displaced inferiorly and anteriorly in children with OSA. |
| Smith 2016/ R-CS          | NI                                                                                                                                                                                                                             | Total: 61<br>OSA: 42<br>Control: 19       | 7.3±1.8                                 | Healthy subjects                      | 4.1 ± 4.8       | White and black                | BMI z-score. OSA: 0.45 ± 1.7; control: 0.37 ± 0.7 | NI                                                                                                                                                                                                                                         | Dimensions of dental arches measured by dental casts and dental clinical measurements.                                                 | Kruskal-Wallis test             | Among children with OSA, the intertooth distances for the first and second deciduous molars and the first permanent molars were narrower than in controls.                                                                |
| Vieira 2011/ P-CS         | OSA: Mouth Breathing Center of the School of Medicine of Ribeirao Preto, University of São Paulo, Brazil. Nasal breathers (control): Pediatric Clinic of the Dental School of Ribeirao Preto, University of Sao Paulo, Brazil. | Total: 49<br>OSA: 20<br>Control: 20       | 7.0-10.0                                | Healthy subjects                      | NI              | NI                             | Only non-obese children                           | The OSA children had obstructive adenoids (more than 70% of the choana) and/or grade III or IV palatine tonsils. Adenoids obstructed less than 50% of the choana and palatine tonsils were grade I or II in all patients in control group. | 11 linear variables related to craniofacial skeletal were measured by cephalometric evaluation.                                        | ANOVA                           | A significant increase in the total and lower anterior heights of the face was observed among children with OSA. The hyoid bone was found to be in a more anterior and inferior position in children with OSA.            |

| Author/Year/ Study design  | Source of sample                                                                                                                                                                                                               | n                                  | Age                                          | Control group features             | OSA index | Ethnicity | BMI                     | Assessment of adenotonsillar size                                       | Craniofacial evaluation                                                                         | Statistical analysis | Main results                                                                                                                                                                                                                                                                                                                                                                                                                                                                                                                                                                                            |
|----------------------------|--------------------------------------------------------------------------------------------------------------------------------------------------------------------------------------------------------------------------------|------------------------------------|----------------------------------------------|------------------------------------|-----------|-----------|-------------------------|-------------------------------------------------------------------------|-------------------------------------------------------------------------------------------------|----------------------|---------------------------------------------------------------------------------------------------------------------------------------------------------------------------------------------------------------------------------------------------------------------------------------------------------------------------------------------------------------------------------------------------------------------------------------------------------------------------------------------------------------------------------------------------------------------------------------------------------|
| Vieira 2014/ P-CS          | OSA: Mouth Breathing Center of the School of Medicine of Ribeirao Preto, University of São Paulo, Brazil. Nasal breathers (control): Pediatric Clinic of the Dental School of Ribeirao Preto, University of Sao Paulo, Brazil. | Total: 29<br>OSA: 14<br>Control:15 | 3.0-6.0                                      | Healthy subjects (nasal breathers) | NI        | NI        | Only non-obese children | NI                                                                      | 10 linear variables related to craniofacial skeletal were measured by cephalometric evaluation. | Linear regression    | The hyoid bone was inferiorly positioned to the palatal ( $44.5 \pm 4.9$ for nasal breathing vs. $48.7 \pm 4.7$ for OSA). The mandibular plane presented an increased inclination ( $8.1 \pm 3.7$ for nasal breathing vs. $11.8 \pm 4.4$ for OSA) in the OSA group.                                                                                                                                                                                                                                                                                                                                     |
| Zettergren-Wijk 2006/ P-CH | NI                                                                                                                                                                                                                             | Total: 34<br>OSA: 17<br>Control:17 | OSA: $5.6 \pm 1.3$<br>Control: $5.8 \pm 1.4$ | Healthy subjects                   | NI        | NI        | NI                      | OSA patients were evaluated at baseline and submitted to A&T surgeries. | 14 linear variables related to craniofacial skeletal were measured by cephalometric evaluation. | ANOVA                | In subjects with OSA, the mandible was more posteriorly inclined, the maxilla was more anteriorly inclined compared with the controls. The anterior face height, the anterior facial ratio and the anterior craniofacial base were greater and posterior face height was smaller in the patients with OSA. The upper and lower incisors were more retroclined in the OSA patients than controls. The position of the tip of the nose (APEX – FHP) was slightly more advanced in OSA group than control subjects. The width of nasopharyngeal airways (ad1 – pm and ad2 – pm) were reduced in OSA group. |
